# Supplementary material for: Direct discharge of patients with simple stable musculoskeletal injuries as an alternative to routine follow-up: a systematic review of the current literature
Source: Springer Nature journal article supplement (doi:10.1007/s00068-021-01784-z), 2021-09-16
Supplement: MOESM1 [file 19668544]

Article title: Direct discharge of patients with simple stable injuries as an alternative to routine follow-up: a systematic review of the current literature

Journal title: European Journal of Trauma and Emergency Surgery

Author names: T.H. Geerdink<sup>1\*</sup>, J. Verbist<sup>1</sup>, J.M. van Dongen<sup>2</sup>, R. Haverlag<sup>1</sup>, R.N. van Veen<sup>1</sup>, J.C. Goslings<sup>1</sup>

<sup>1</sup>: Department of Trauma Surgery, OLVG Hospital, Amsterdam, the Netherlands

<sup>2</sup>: Department of Health Sciences, Faculty of Science, Amsterdam Movement Sciences research institute, Vrije Universiteit, Amsterdam, the Netherlands.

\*: Corresponding author, Address: Jan Tooropstraat 164, 1061 AE, Amsterdam,

E-mail: [t.h.geerdink@olvg.nl](mailto:t.h.geerdink@olvg.nl); ORCID-ID: 0000-0001-7618-5425

### **Supplement Statement**

The supplementary materials present tables depicting the Patients, Intervention, Control, Outcome strategy (Table S1) used to develop the search strategy (Table S2). Table S3 shows the distribution of the patients within the intervention cohort (i.e. direct discharge straight after the ED attendance (ED DD), after virtual review (VFC DD), or follow-up after virtual review (VFC FU). Immobilization before and after direct discharge protocols were implemented, are summarized in Table S4. Furthermore, the individual scores of the risk of bias assessment are depicted per study in Table S5. Patient-reported outcome and experience measures other than treatment satisfaction and functional outcome using a validated questionnaire are summarized in Table S6.

## Appendix tables

Table S1 – Patient, Intervention, Control, Outcome (PICO) strategy used to develop search strategy

| <b>PICO</b>                | <b>Criteria</b>                                                                                                                                                  |
|----------------------------|------------------------------------------------------------------------------------------------------------------------------------------------------------------|
| Population                 | Patients of any age presenting to the ED with any type of musculoskeletal injury                                                                                 |
| Interventions              | Direct discharge, either straight from the ED (ED DD) or after virtual review (VFC DD)                                                                           |
| Comparison (if applicable) | No direct discharge (i.e. routine follow-up with at least one appointment)                                                                                       |
| Outcome                    | Patient direct discharge rate<br>Logistic effects<br>Financial effects<br>Functional outcome<br>Patient reported outcome/experience measures<br>Adverse outcomes |

DD, Direct Discharge; ED, Emergency Department; PICO, Patient, Intervention, Control, Outcome; VFC, Virtual Fracture Clinic

Table S2 – Search strategy in MEDLINE

| No. | Query                                                                                                                                                                                                                                                                                                                                                                                                                                                                                                          | Results   |
|-----|----------------------------------------------------------------------------------------------------------------------------------------------------------------------------------------------------------------------------------------------------------------------------------------------------------------------------------------------------------------------------------------------------------------------------------------------------------------------------------------------------------------|-----------|
| #6  | (#1 OR #5)                                                                                                                                                                                                                                                                                                                                                                                                                                                                                                     | 1,504     |
| #5  | (#2 AND #3 AND #4)                                                                                                                                                                                                                                                                                                                                                                                                                                                                                             | 958       |
| #4  | "Virtual Reality Exposure Therapy"[Mesh] OR "Telemedicine"[Mesh] OR "User-Computer Interface"[Mesh] OR "Remote Consultation"[Mesh] OR electronic referral*[tiab] OR remote consult*[tiab] OR teleconsult*[tiab] OR tele-consult*[tiab] OR virtual*[tiab] OR Re-design*[tiab] OR redesign*[tiab]                                                                                                                                                                                                                | 174,030   |
| #3  | "Patient Discharge"[Mesh] OR "Outpatient Clinics, Hospital"[Mesh] OR "Ambulatory Care Facilities"[Mesh] OR "Ambulatory Care"[Mesh] OR "Outpatients"[Mesh] OR "Appointments and Schedules"[Mesh] OR "Aftercare"[Mesh] OR outpatient*[tiab] OR discharge*[tiab] OR ambulatory[tiab] OR clinic visit*[tiab] OR aftercare*[tiab] OR follow-up[tiab] OR followup[tiab] OR "Referral and Consultation"[Mesh:NoExp] OR visit[tiab] OR visits[tiab] OR appointment*[tiab] OR referral*[tiab]                           | 170,2013  |
| #2  | "Fractures, Bone"[Mesh] OR "Wounds and Injuries"[Mesh:NoExp] OR "Arm Injuries"[Mesh] OR "Athletic Injuries"[Mesh] OR "Fractures, Cartilage"[Mesh] OR "Hand Injuries"[Mesh] OR "Finger Injuries"[Mesh] OR "Hip Injuries"[Mesh] OR "Joint Dislocations"[Mesh] OR "Leg Injuries"[Mesh] OR "Multiple Trauma"[Mesh] OR "Shoulder Injuries"[Mesh] OR "Sprains and Strains"[Mesh] OR "Tendon Injuries"[Mesh] OR "injuries" [Subheading] OR fracture*[tiab] OR injur*[tiab] OR orthopedic*[tiab] OR orthopaedic*[tiab] | 1,218,483 |
| #1  | Fracture clinic*[tiab] OR direct discharge*[tiab] OR ((trauma[tiab] OR fractur*[tiab] OR orthopaedic*[tiab] OR orthopedic*[tiab]) AND (triage clinic*[tiab] OR virtual clinic*[tiab] OR virtual triag*[tiab] OR clinic design*[tiab] OR clinic redesign*[tiab] OR clinic re-design*[tiab] OR service design*[tiab] OR service redesign*[tiab] OR service re-design*[tiab]))                                                                                                                                    | 581       |

Table S3 - Distribution of patients in intervention cohort

| Author                 | Distribution of patients in intervention cohort; n (%) |      |       |      |        |      |        |      |
|------------------------|--------------------------------------------------------|------|-------|------|--------|------|--------|------|
|                        | ED DD                                                  |      | ED FU |      | VFC DD |      | VFC FU |      |
|                        | n                                                      | %    | n     | %    | n      | %    | n      | %    |
| Abdelmalek [1]         | 6                                                      | 22.2 | 21    | 77.8 |        |      |        |      |
| Bhattacharyya [2]      |                                                        |      |       |      | 62     | 44.9 | 76     | 55.1 |
| Breathnach [3]         |                                                        |      |       |      | 42     | 26.8 | 111    | 70.7 |
| Brogan [4]             |                                                        |      |       |      | 499    | 75.3 | 164    | 24.7 |
| Brooksbank [5]         | 45                                                     | 95.7 |       |      | 1      | 2.15 | 1      | 2.15 |
| Evans [6]              |                                                        |      |       |      | 54     | 2.15 | 228    | 78.4 |
| Ferguson [7]           | 194                                                    | 57.2 |       |      | 86     | 25.4 | 59     | 17.4 |
| Ibrahim [8]            |                                                        |      |       |      | 38     | 38.0 | 62     | 62.0 |
| Jayaram [9]            | 137                                                    | 67.8 |       |      | 45     | 22.3 | 20     | 9.9  |
| Vardy/Jenkins [10, 11] | 2,115                                                  | 33.1 |       |      | 1,687  | 26.4 | 2,583  | 40.5 |
| Kelly [12]             |                                                        |      |       |      | 45     | 18.2 | 202    | 81.8 |
| Little [13]            |                                                        |      |       |      | 968    | 26.1 | 2,741  | 73.9 |
| Matthews [14]          | 18                                                     | 78.3 | 5     | 21.7 |        |      |        |      |
| O'Reilly [15]          |                                                        |      |       |      | 901    | 33.3 | 1,803  | 66.7 |
| Seewoonarain [16]      |                                                        |      |       |      | 33     | 75.0 | 11     | 25.0 |
| White [17]             |                                                        |      |       |      | 3,222  | 26.7 | 8,847  | 73.3 |

Patient distribution in the intervention cohort, indicating whether all patients were discharged directly from the Emergency Department (ED DD), or after Virtual Fracture Clinic review (VFC DD)

Table S4 – Immobilization used before and after implementing direct discharge

| <b>Author</b>                     | <b>Pre-DD</b>                                                                                | <b>Post-DD</b>                                                            |
|-----------------------------------|----------------------------------------------------------------------------------------------|---------------------------------------------------------------------------|
| Abdelmalek [1]                    | Neighbour strapping                                                                          | Neighbour strapping                                                       |
| Bansal [18]                       | Plaster slab                                                                                 | Neighbour strapping                                                       |
| Bhattacharyya [2]                 | Sling                                                                                        | Sling                                                                     |
| Breathnach [3]                    | Unclear                                                                                      | Unclear                                                                   |
| Brogan [4]                        | Non-weightbearing cast                                                                       | Blackboot                                                                 |
| Brooksbank [5]                    | Unclear                                                                                      | Unclear                                                                   |
| Callender [19]                    | Backslab                                                                                     | Softcast                                                                  |
| Evans [6]                         | Variable                                                                                     | Variable                                                                  |
| Ferguson [7]                      | Variable                                                                                     | Elastic bandage or Velcro boot                                            |
| Gamble [20]                       | NR                                                                                           | Neighbour strapping                                                       |
| Gleeson [21] – I                  | Torus: POP cast; Clavicle: sling                                                             | Torus: Velcro wrist splint or soft cast back slab if <2y; Clavicle: sling |
| Gleeson [22] – II                 | 5MC: ulnar gutter slab; 5MT: below knee back slab plaster cast; Weber A: below knee POP cast | 5MC: neighbour strapping; 5MT: tubi grip; Weber A: removable orthosis     |
| Hamilton [23]                     | Rigid cast                                                                                   | Soft cast                                                                 |
| Ibrahim [8]                       | NR                                                                                           | NR                                                                        |
| Jayaram [9]                       | NR                                                                                           | NR                                                                        |
| Jenkins [11]                      | NR                                                                                           | Removable Velcro splints where required                                   |
| Kelly [12]                        | NR                                                                                           | NR                                                                        |
| Khan [24]                         | Rigid cast                                                                                   | Soft cast                                                                 |
| Little [13]                       | NR                                                                                           | NR                                                                        |
| Mackenzie [25] – MC5              | Variable                                                                                     | Neighbour strapping with/without removable splint                         |
| Mackenzie [25] – MT5              | Variable                                                                                     | Removable weight-bearing orthosis                                         |
| Mackenzie [25] – radial head/neck | Variable                                                                                     | Collar and cuff                                                           |
| Matthews [14]                     | Broad arm sling                                                                              | Broad arm sling                                                           |
| O'Reilly [15]                     | NR                                                                                           | Removable splint or cast                                                  |
| Robinson [26]                     | NR                                                                                           | Finger stall, wrist splint, collar & cuff, walking boot                   |
| Seewoonarain [16]                 | Plaster or Paris or splint                                                                   | Cast, softcast or splint                                                  |
| Vardy [10]                        | Unclear                                                                                      | Unclear                                                                   |
| White [17]                        | NR                                                                                           | Removable orthosis                                                        |

DD, Direct discharge; 5MC, Fifth metacarpal; 5MT, Fifth metatarsal; NR, Not reported; POP, Position-of-protection; y, years;

Table S5 – Risk of bias assessment of the included studies

| Author                 | Newcastle Ottawa Scale (cohort studies) |                 |                | Cochrane Collaboration's Risk of Bias Tool (RCTs) |                        |                                     |                                |                         |                     | Assessment level      |              |
|------------------------|-----------------------------------------|-----------------|----------------|---------------------------------------------------|------------------------|-------------------------------------|--------------------------------|-------------------------|---------------------|-----------------------|--------------|
|                        | Selection                               | Comparability   | Outcome        | Random sequence generation                        | Allocation concealment | Blinding of participants/ personnel | Blinding of outcome assessment | Incomplete outcome data | Selective reporting | Other sources of bias | Risk of bias |
| <b>Comparative</b>     |                                         |                 |                |                                                   |                        |                                     |                                |                         |                     |                       |              |
| Abdelmalek [1]         | ***                                     |                 | ***            |                                                   |                        |                                     |                                |                         |                     |                       | Unclear      |
| Bansal [18]            | ****                                    |                 | ***            |                                                   |                        |                                     |                                |                         |                     |                       | Low          |
| Ferguson [7]           | ****                                    |                 | ***            |                                                   |                        |                                     |                                |                         |                     |                       | Low          |
| Hamilton [23]          |                                         |                 |                | Low                                               | Low                    | High                                | Low                            | High                    | Unclear             | Low                   | High         |
| Kelly [12]             | ***                                     |                 | **             |                                                   |                        |                                     |                                |                         |                     |                       | Unclear      |
| Khan [24]              |                                         |                 |                | Unclear                                           | Unclear                | High                                | High                           | High                    | Unclear             | Unclear               | High         |
| Mackenzie [25]         | ****                                    |                 | ***            |                                                   |                        |                                     |                                |                         |                     |                       | Low          |
| Matthews [14]          | ***                                     |                 | ***            |                                                   |                        |                                     |                                |                         |                     |                       | Unclear      |
| Seewoonarain [16]      | ****                                    |                 | ***            |                                                   |                        |                                     |                                |                         |                     |                       | Low          |
| Vardy [10]             | ****                                    | *               | ***            |                                                   |                        |                                     |                                |                         |                     |                       | Low          |
| <b>Non-comparative</b> |                                         |                 |                |                                                   |                        |                                     |                                |                         |                     |                       |              |
|                        | <b>Selection</b>                        | <b>Exposure</b> | <b>Outcome</b> |                                                   |                        |                                     |                                |                         |                     |                       |              |
| Bhattacharyya [2]      | **                                      | *               | **             |                                                   |                        |                                     |                                |                         |                     |                       | Low          |
| Breathnach [3]         |                                         | *               | **             |                                                   |                        |                                     |                                |                         |                     |                       | Unclear      |
| Brogan [4]             | **                                      | *               | ***            |                                                   |                        |                                     |                                |                         |                     |                       | Low          |
| Brooksbank [5]         | **                                      | *               | **             |                                                   |                        |                                     |                                |                         |                     |                       | Low          |
| Callender [19]         | *                                       | *               | **             |                                                   |                        |                                     |                                |                         |                     |                       | Unclear      |
| Evans [6]              | **                                      | *               | *              |                                                   |                        |                                     |                                |                         |                     |                       | Unclear      |
| Gamble [20]            | **                                      | *               | **             |                                                   |                        |                                     |                                |                         |                     |                       | Low          |
| Gleeson [21] – I       |                                         | *               | *              |                                                   |                        |                                     |                                |                         |                     |                       | High         |
| Gleeson [22] – II      |                                         | *               | *              |                                                   |                        |                                     |                                |                         |                     |                       | High         |
| Ibrahim [8]            | **                                      | *               | **             |                                                   |                        |                                     |                                |                         |                     |                       | Low          |
| Jayaram [9]            | *                                       | *               | **             |                                                   |                        |                                     |                                |                         |                     |                       | Unclear      |
| Jenkins [11]           | **                                      | *               | ***            |                                                   |                        |                                     |                                |                         |                     |                       | Low          |
| Little [13]            | **                                      | *               | ***            |                                                   |                        |                                     |                                |                         |                     |                       | Low          |
| O'Reilly [15]          | *                                       | *               | ***            |                                                   |                        |                                     |                                |                         |                     |                       | Low          |
| Robinson [26]          | **                                      | *               | ***            |                                                   |                        |                                     |                                |                         |                     |                       | Low          |
| White [17]             | *                                       | *               | ***            |                                                   |                        |                                     |                                |                         |                     |                       | Low          |

Risk of bias was assessed using the Newcastle-Ottawa Quality Assessment Scale for cohort studies (Selection, maximum four stars, Comparability, maximum two stars and Outcome, maximum three stars). Using the NOS, an overall score of 7 to 9 stars is considered as low risk of bias, 4 to 6 as unclear risk of bias, and 3 or less as high risk of bias. The NOS was adapted by the authors to be suitable to studies of non-comparative design (Selection, maximum two stars, Exposure, maximum one star, and Outcome, maximum three stars). For the adapted NOS an overall score of 5 to 6 stars is considered as low risk of bias, 3 to 4 as unclear risk of bias, and 2 or less as high risk of bias. Randomized controlled were assessed using Cochrane Collaboration's Risk of Bias Tool. Using this tool, the overall risk of bias is Low if all domains are rated as low, High if at least one domain is assessed as high, and Unclear if at least one domain is assessed as unclear and no domains are assessed as high.

Table S6 - Patient reported outcome- and experience measures

| Measure                                          | Author               | Specification                       | Assessment  |        |            | Control           |                 | DD                    |                 | Sig.  |
|--------------------------------------------------|----------------------|-------------------------------------|-------------|--------|------------|-------------------|-----------------|-----------------------|-----------------|-------|
|                                                  |                      |                                     | Reported as | When   | How        | Score             | Resp. rate; (%) | Score                 | Resp. rate; (%) |       |
| Satisfaction w/<br>support /<br>information      | Breathnach [3]       | Information (in ED), Y/N            | Proportion  | 18-24m | Phone      |                   |                 | 93% Yes               | 76.2            |       |
|                                                  | Bhattacharyya [2]    | Information (leaflet), 4P Likert    | Proportion  | 1y     | Post       |                   |                 | 86.4% S               | 71.0            |       |
|                                                  | Ferguson [7]         | Information (written), 4P Likert*   | Proportion  | 1y     | NR         | NR                |                 | 79.6% S or VS         | 63.7            |       |
|                                                  | Jayaram [9]          | Information (provided), 4P Likert*  | Proportion  | >6m    | Post/phone |                   |                 | 95% S                 | 77.0            |       |
|                                                  | Bansal [18]          | Support, scale 1-10                 | Mean        | 12w    | Phone      | 5.5 (SD 1.7)      | NR              | 6.4 (SD 2.0)          | NR              | 0.04  |
| Satisfaction w/<br>treatment                     | Evans [6]            | Process, Likert*                    | Proportion  | NR     | Phone      |                   |                 | 85% VS; 15% S         | 60.0            |       |
| (Satisfaction w/<br>injury outcome /<br>recovery | Bansal [18]          | Lack of terminal extension, Y/N     | Proportion  | 12w    | Phone      | 10% Yes           | NR              | 2.6% Yes              | NR              | NS    |
|                                                  | Bhattacharyya [2]    | Satisfaction with outcome, Likert   | Proportion  | 1y     | Post       |                   |                 | 91% VS or S           | 71.0            |       |
|                                                  | Breathnach [3]       | Satisfaction with outcome, Likert   | Proportion  | 18-24m | Phone      |                   |                 | 97% A or SA           | 76.2            |       |
|                                                  | Ferguson [7]         | Satisfaction w/ outcome*            | 4P Likert   | 1y     | NR         | NR                |                 | 78% S or VS           | 63.7            |       |
|                                                  | Gamble [20]          | Satisfaction with outcome, Likert   | Proportion  | >1y    | Post/phone |                   |                 | 80.6% VS or S         | 59.0            |       |
|                                                  | Khan [24]            | ROM compared to other side          | NR          | 4-5w   | Phone      | All full recovery | 100 (48)        | All full recovery     | 100             | -     |
|                                                  | Matthews [14]        | Back to normal activities           | NR          | >6m    | NR         | NR                |                 | All, no residual pain | 100             | NR    |
|                                                  | O'Reilly [15]        | Satisfaction with outcome, Likert   | Proportion  | NR     | Phone      |                   |                 | 97% A or SA           | 3.6             |       |
| Treatment<br>preference                          | Breathnach [3]       | Would prefer face-to-face FU        | Y/N         | 18-24m | Phone      |                   |                 | 28% Yes               | 76.2            |       |
|                                                  | Matthews [14]        | Would prefer face-to-face FU        | Y/N         | >6m    | NR         | NR                |                 | 22% Yes               | 100             | NR    |
|                                                  | Mackenzie [25] – all | Would prefer face-to-face or DD     | Proportion  |        |            | 65% prefer DD     | 56.4            | 75% prefer DD         | 72.3            | NR    |
|                                                  | Khan [24]            | Would prefer treatment again        | Y/N         | 4-5w   | Phone      | 6.3% yes          | 100             | 98.6% Yes             | 100             | <0.01 |
| Other clinician                                  | Gamble [20]          | Contacted GP                        | Y/N         | >1y    | Post/phone |                   |                 | 20.4% Yes             | 59.0            |       |
|                                                  | Bhattacharyya [2]    | Visited GP                          | Y/N         | 1y     | Post       |                   |                 | 15.9% Yes             | 71.0            |       |
|                                                  | Breathnach [3]       | Visited GP                          | Y/N         | 18-24m | Phone      |                   |                 | 6.3% Yes              | 76.2            |       |
|                                                  | Gleeson [21] – I     | Visited GP                          | Y/N         | 3-6w   | Phone      |                   |                 | 0% Yes                | 45.9            |       |
|                                                  | Brooksbank [5]       | Visited GP / other clinician        | Y/N         | 1y     | Post       |                   |                 | 19% Yes               | 77.0            |       |
|                                                  | O'Reilly [15]        | Visited GP / other clinician        | Y/N         | NR     | Phone      |                   |                 | 6% Yes                | 3.6             |       |
|                                                  | Jayaram [9]          | Visited other clinician*            | Y/N         | >6m    | Post/phone |                   |                 | 13% Yes               | 77.0            |       |
|                                                  | Ferguson [7]         | Visited other hospital*             | Y/N         | 1y     | NR         | NR                |                 | 2.8% Yes              | 63.7            |       |
| Helpline use                                     | Breathnach [3]       | Aware of availability               | Y/N         | 18-24m | Phone      |                   |                 | 38% Yes               | 76.2            |       |
|                                                  | Jayaram [9]          | Aware of availability               | Y/N         | NR     | Phone      |                   |                 | 94% Yes               | 3.6             |       |
|                                                  | Jayaram [9]          | Satisfied with, if used, 4P Likert* | Proportion  | >6m    | Post/phone |                   |                 | 93% S                 | 77.0            |       |
|                                                  | Bhattacharyya [2]    | Used                                | Y/N         | 1y     | Post       |                   |                 | 9.1% Yes              | 71.0            |       |
|                                                  | Ferguson [7]         | Used*                               | Y/N         | 1y     | NR         | NR                |                 | 15.7% Yes             | 63.7            |       |
|                                                  | Brooksbank [5]       | Used                                | Y/N         | 1y     | Post       |                   |                 | 25% Yes               | 77.0            |       |
|                                                  | Gamble [20]          | Used                                | Y/N         | >1y    | Post/phone |                   |                 | 3.1% Yes              | 59.0            |       |
| Return-to-work                                   | Bansal [18]          |                                     | w, mean     | 12w    | Phone      | 5.0 (SD 2.2)      | NR              | 2.7 (SD 1.5)          | NR              | <0.01 |
|                                                  | Mackenzie [25] – 5MC |                                     | w, median   | 6m     | NR         | 0 (0 to 0)        | 21.0            | 0 (0 to 2.0)          | 53.0            | NS    |
|                                                  | Mackenzie [25] – 5MT |                                     | w, median   | 6m     | NR         | 2.0 (0 to 4.0)    | 66.0            | 1.0 (0 to 2.0)        | 80.0            | NS    |
|                                                  | Mackenzie [25] – RH  |                                     | w, median   | 6m     | NR         | 0 (0 to 3.0)      | 80.0            | 1.0 (0 to 3.5)        | 80.0            | NS    |
|                                                  | Mackenzie [25] – RH  |                                     | w, median   | 6m     | NR         | 0 (0 to 3.0)      | 80.0            | 1.0 (0 to 3.5)        | 80.0            | NS    |
| Return to sport                                  | Mackenzie [25] – 5MC |                                     | w, median   | 6m     | NR         | 2.0 (0 to 4.0)    | 21.0            | 2.0 (0 to 4.0)        | 53.0            | NS    |
|                                                  | Mackenzie [25] – 5MT |                                     | w, median   | 6m     | NR         | 6.0 (4.0 to 12.0) | 66.0            | 6.0 (4.0 to 8.0)      | 80.0            | NS    |
|                                                  | Mackenzie [25] – RH  |                                     | w, median   | 6m     | NR         | 6.0 (3.8 to 8.0)  | 80.0            | 6.0 (4.0 to 8.0)      | 80.0            | NS    |

Studies that reported on any type of patient-reported outcome measure excluding functional outcome. 5MC, Fifth metacarpal; 5MT, Fifth metatarsal; DD, Direct Discharge; ED, Emergency Department; FU, follow-up; GP, General Practitioner; m, months; NR, Not reported; NS, Not significant; P, Point; ROM, Range of Movement; RR, Response rate; S, Satisfied; SD, Standard deviation; Sig., Significance level; VS, Very satisfied; w, weeks; y, year(s)

\*there was no subgroup analysis exclusively of patients that were discharged directly



## References

- [1] Abdelmalek A, Harrison E, Scott S. Closed fifth metacarpal neck fractures: Do they need to be seen in fracture clinic? An emergency department pathway for assessment, management and criteria for fracture clinic referral. *Trauma*. 2014;17:47-51.
- [2] Bhattacharyya R, Jayaram PR, Holliday R, Jenkins P, Anthony I, Rymaszewski L. The virtual fracture clinic: Reducing unnecessary review of clavicle fractures. *Injury*. 2017;48:720-3.
- [3] Breathnach O, O'Reilly M, Morrissey K, Conlon B, Sheehan E. Electronic referrals for virtual fracture clinic service using the National Integrated Medical Imaging System (NIMIS). *Ir J Med Sci*. 2019;188:371-7.
- [4] Brogan K, Bellringer S, Akehurst H, Gee C, Ibrahim N, Cassidy L, et al. Virtual fracture clinic management of fifth metatarsal, including Jones', fractures is safe and cost-effective. *Injury*. 2017;48:966-70.
- [5] Brooksbank K, Jenkins PJ, Anthony IC, Gilmour A, Nugent MP, Rymaszewski LA. Functional outcome and satisfaction with a "self-care" protocol for the management of mallet finger injuries: a case-series. *J Trauma Manag Outcomes*. 2014;8:21.
- [6] Evans D, Hardman J, Middleton SD, Anakwe RE. Developing a virtual fracture clinic for hand and wrist injuries. *J Hand Surg Eur Vol*. 2018;43:893-4.
- [7] Ferguson KB, McGlynn J, Jenkins P, Madeley NJ, Kumar CS, Rymaszewski L. Fifth metatarsal fractures - Is routine follow-up necessary? *Injury*. 2015;46:1664-8.
- [8] Ibrahim A, Jordan DJ, Khan MAA, Lowrie AG. The virtual hand clinic: its use in optimizing trauma footfall in a hand trauma unit. 2018. p. 564--6.
- [9] Jayaram PR, Bhattacharyya R, Jenkins PJ, Anthony I, Rymaszewski LA. A new "virtual" patient pathway for the management of radial head and neck fractures. *J Shoulder Elbow Surg*. 2014;23:297-301.
- [10] Vardy J, Jenkins PJ, Clark K, Chekroud M, Begbie K, Anthony I, et al. Effect of a redesigned fracture management pathway and 'virtual' fracture clinic on ED performance. *BMJ Open*. 2014;4:e005282.
- [11] Jenkins PJ, Gilmour A, Murray O, Anthony I, Nugent MP, Ireland A, et al. The Glasgow Fracture Pathway: a virtual clinic. *Bjj*. 2014;395:22--4.
- [12] Kelly M, O'Keeffe N, Francis A, Moran C, Gantley K, Doyle F, et al. Connolly Hospital Trauma Assessment Clinic (TAC): a virtual solution to patient flow. *Ir J Med Sci*. 2020;189:425-9.
- [13] Little M, Huntley D, Morris J, Jozsa F, Hardman J, Anakwe RE. The virtual fracture clinic improves quality of care for patients with hand and wrist injuries: an assessment of 3709 patients. *J Hand Surg Eur Vol*. 2020;45:748-53.
- [14] Matthews AH, Boyd M, Bott AR, Metcalfe JE. Improving emergency department management of paediatric clavicle fractures: a complete audit cycle. *Br J Hosp Med (Lond)*. 2014;75:287-9.
- [15] M OR, Breathnach O, Conlon B, Kiernan C, Sheehan E. Trauma assessment clinic: Virtually a safe and smarter way of managing trauma care in Ireland. *Injury*. 2019;50:898-902.
- [16] Seewoonarain S, Babu S, Sangoi D, Avasthi A, Ricketts D. Introducing a Virtual Fracture Clinic Increases Efficiency and Reduces Costs in Torus Fracture Management. *Pediatr Qual Saf*. 2019;4:e202.
- [17] White TO, Mackenzie SP, Carter TH, Jefferies JG, Prescott OR, Duckworth AD, et al. The evolution of fracture clinic design : the activity and safety of the Edinburgh Trauma Triage Clinic, with one-year follow-up. *Bone Joint J*. 2017;99-B:503-7.
- [18] Bansal R, Craigen MA. Fifth metacarpal neck fractures: is follow-up required? *J Hand Surg Eur Vol*. 2007;32:69-73.
- [19] Callender O, Koe S. Using Softcast to treat torus fractures in a paediatric emergency department Using Softcast to Treat Torus Fractures in a Paediatric Emergency Department. *Irish Medical Journal*. 2015:23--5.
- [20] Gamble D, Jenkins PJ, Edge MJ, Gilmour A, Anthony IC, Nugent M, et al. Satisfaction and functional outcome with "self-care" for the management of fifth metacarpal fractures. *Hand (N Y)*. 2015;10:607-12.
- [21] Gleeson L, Murray O. Fracture Clinic Redesign in the Ed: Breaking the Mould. *Emergency Nurse New Zealand*. 2016:P14--P7.
- [22] Gleeson L, Murray O. Fracture Clinic Redesign in the Ed: Breaking the Mould. Part Two: Weber A, 5TH Metacarpal and 5TH ETATARSAL FRACTURES. *Emergency Nurse New Zealand*. 2016:P12--P5.
- [23] Hamilton TW, Hutchings L, Alsousou J, Tutton E, Hodson E, Smith CH, et al. The treatment of stable paediatric forearm fractures using a cast that may be removed at home: comparison with traditional management in a randomised controlled trial. *Bone Joint J*. 2013;95-B:1714-20.
- [24] Khan KS, Grufferty A, Gallagher O, Moore DP, Fogarty E, Dowling F. A randomized trial of 'soft cast' for distal radius buckle fractures in children. *Acta Orthopaedica Belgica*. 2007;73:594--7.
- [25] Mackenzie SP, Carter TH, Jefferies JG, Wilby JBJ, Hall P, Duckworth AD, et al. Discharged but not dissatisfied: outcomes and satisfaction of patients discharged from the Edinburgh Trauma Triage Clinic. *Bone Joint J*. 2018;100-B:959-65.
- [26] Robinson PM, Sim F, Latimer M, Mitchell PD. Paediatric fracture clinic re-design: Incorporating a virtual fracture clinic. *Injury*. 2017;48:2101-5.
